# Supplementary material
Source: MDPI journal article supplement (https://www.mdpi.com/2073-4441/13/13/1720)
Supplement: s1 [file s1]

## Supplementary Materials

**Supplementary Figure S1.** Annual variations of the nutrients (TP, TN, and their ratio), chlorophyll a (CHL-a), organic matters (BOD, TOC), and total suspended solids (TSS), along with CHL:TN, CHL:TN (red line – mean value).

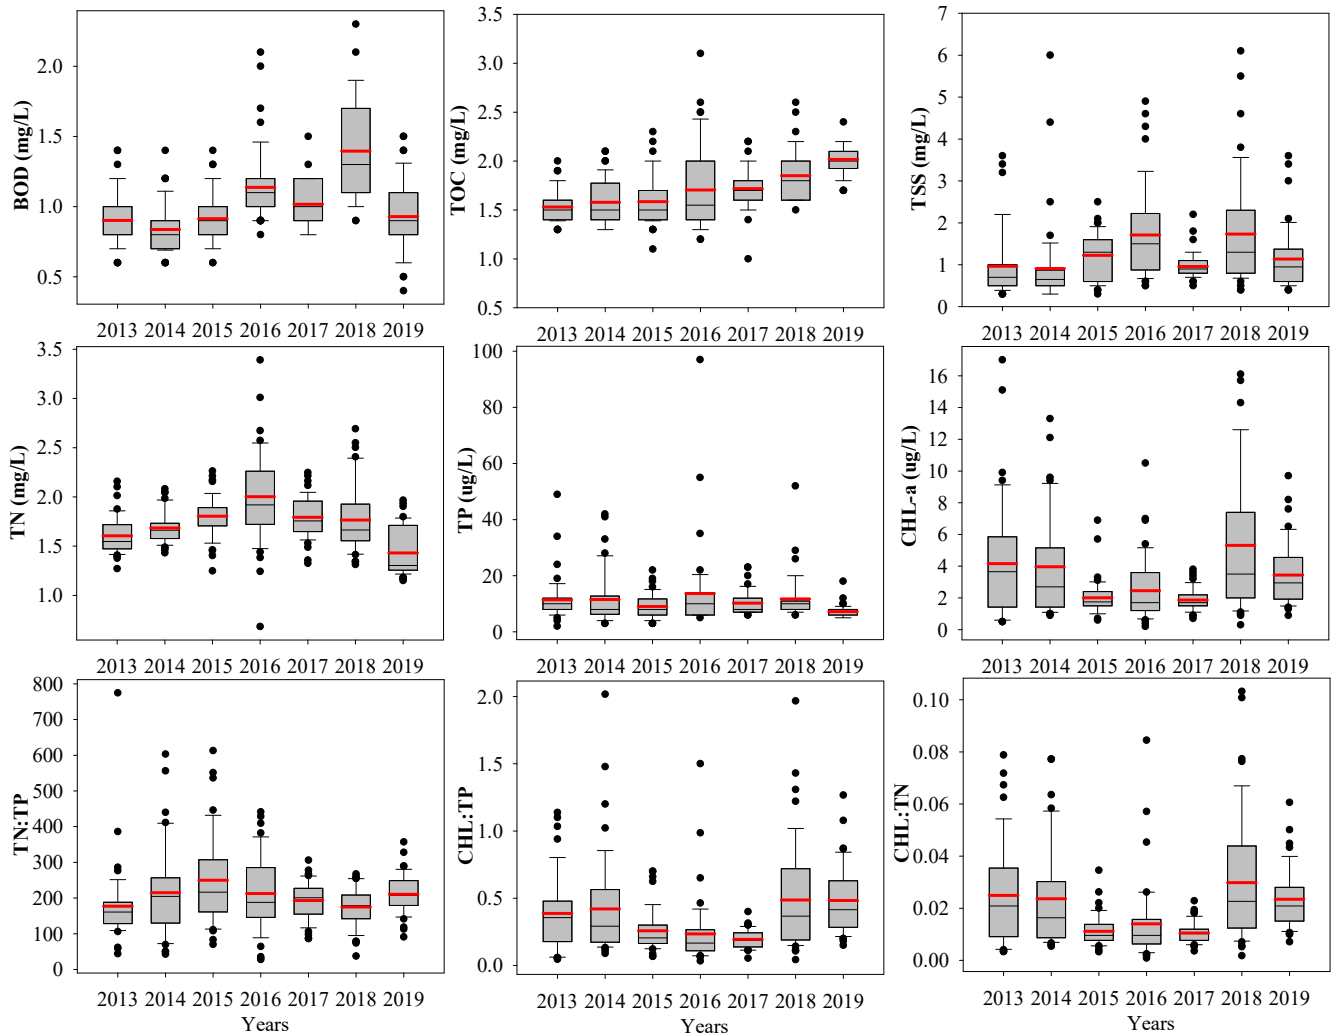

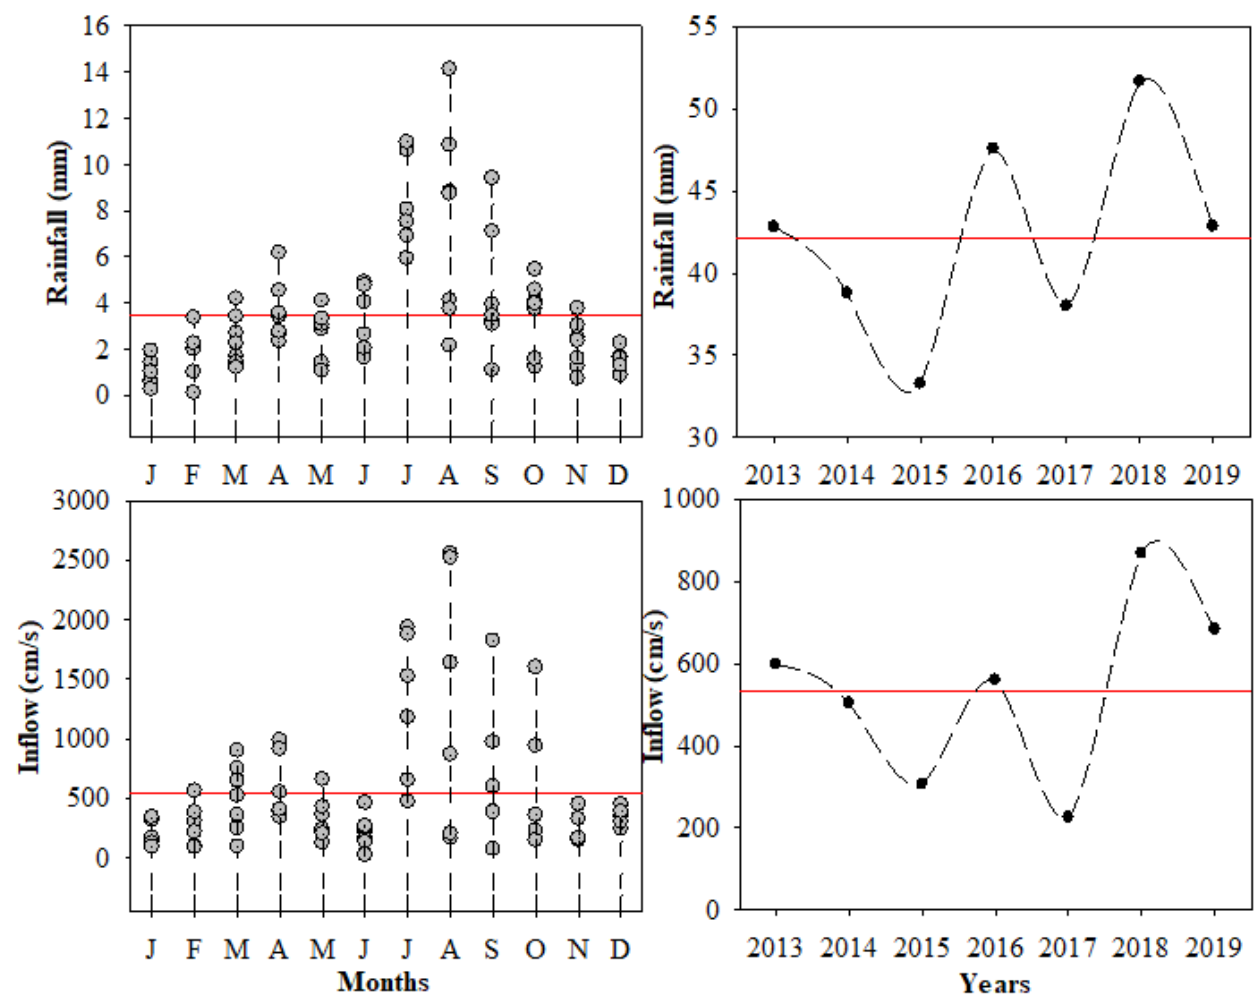

**Supplementary Figure S2.** Annual (right) and seasonal (left) trends in the rainfall and inflow patterns in Yongdam Reservoir water basin during the study periods (red line – average value).
